# Supplementary material for: Antibacterial and Antibiofouling Activities of Carbon Polymerized Dots/Polyurethane and C60/Polyurethane Composite Films
Source: MDPI journal article supplement (doi:10.3390/jfb15030073), 2024-03-17
Supplement: s1 [file s1]

Supplementary Materials

# Antibacterial and Antibiofouling Activities of Carbon Polymerized Dots/Polyurethane and C<sub>60</sub>/Polyurethane Composite Films

Zoran M. Marković <sup>1,\*</sup>, Milica D. Budimir Filimonović <sup>1</sup>, Dušan D. Milivojević <sup>1</sup>, Janez Kovac <sup>2</sup>  
and Biljana M. Todorović Marković <sup>1,\*</sup>

<sup>1</sup> Vinča Institute of Nuclear Sciences, National Institute of the Republic of Serbia, University of Belgrade, Belgrade, Serbia; mickbudimir@gmail.com (M.D.B.F.); dusanm@vinca.rs (D.D.M.)

<sup>2</sup> Jozef Stefan Institute, Department of Surface Engineering, Jamova 39, SI-1000 Ljubljana, Slovenia; janez.kovac@ijs.si

\* Correspondence: zoranmarkovic@vin.bg.ac.rs (Z.M.M.); biljatod@vin.bg.ac.rs (B.M.T.M.);  
Tel.: +381-11-3408582

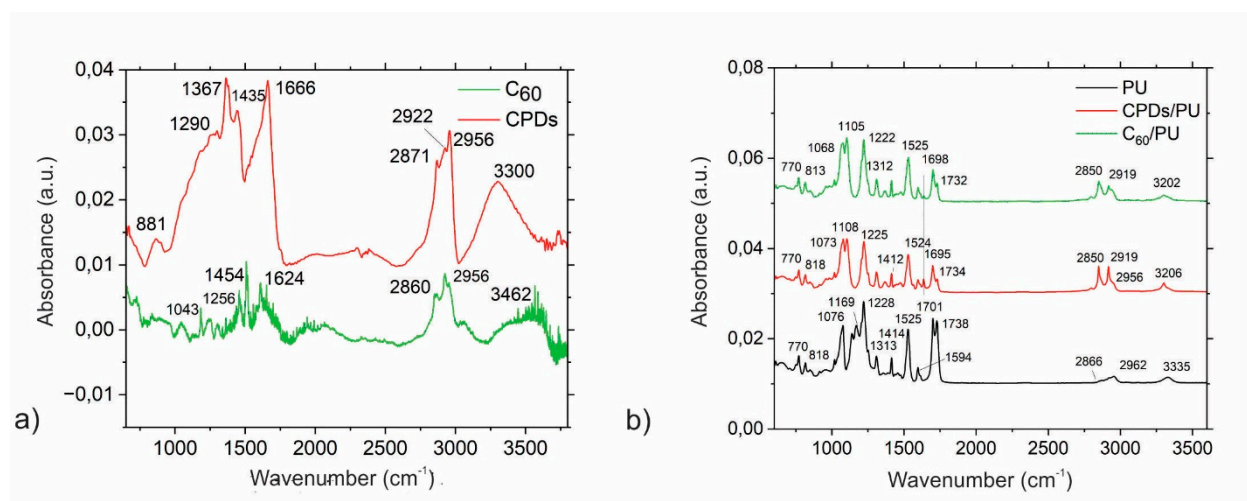

**Figure S1.** (a) FTIR spectra of C<sub>60</sub> (black curve) and CPDs (red curve) and (b) FTIR spectra of neat PU (black curve), CPDs/PU (red curve) and C<sub>60</sub>/PU (green curve). All spectra are displaced for clarity.

**Table S1.** Position of characteristic bonds and shifts ( $\Delta$ ) identified in all samples in  $\text{cm}^{-1}$ .

| Material | PU ( $\text{cm}^{-1}$ ) | CPDs ( $\text{cm}^{-1}$ ) | CPDs/PU ( $\text{cm}^{-1}$ ) | $\Delta$ ( $\text{cm}^{-1}$ ) | C <sub>60</sub> ( $\text{cm}^{-1}$ ) | C <sub>60</sub> /PU ( $\text{cm}^{-1}$ ) | $\Delta$ ( $\text{cm}^{-1}$ ) | Characteristic bonds      |
|----------|-------------------------|---------------------------|------------------------------|-------------------------------|--------------------------------------|------------------------------------------|-------------------------------|---------------------------|
|          | 3335                    | 3300                      | 3206                         | 94                            | 3462                                 | 3202                                     | -260 <sup>1</sup>             | O-H                       |
|          | 2962                    | 2956                      | 2956                         | -6                            | 2956                                 | -                                        | -                             | C-H stretching vibrations |
|          | -                       | 2922                      | 2919                         | -3                            | -                                    | 2919                                     | -                             | C-H stretching vibrations |
|          | 2866                    | 2871                      | 2850                         | -21                           | 2860                                 | 2850                                     | -10 <sup>2</sup>              | C-H stretching vibrations |
|          | 1738                    | -                         | 1734                         | -4                            | -                                    | 1732                                     | -6                            | C=O                       |
|          | 1701                    | -                         | 1695                         | -6                            | -                                    | 1698                                     | -3                            | C=O                       |
|          | -                       | 1666                      | 1636                         | -30                           | -                                    | -                                        | -                             | C=N                       |
|          | -                       | -                         | -                            | -                             | 1624                                 | 1634                                     | 10                            | C=C                       |
|          | 1594                    | -                         | 1594                         | 0                             | -                                    | 1598                                     | -                             | C=C                       |
|          | 1525                    | -                         | 1524                         | -1                            | -                                    | 1525                                     | -                             | N-O stretching vibrations |
|          |                         |                           |                              |                               | 1454                                 | -                                        | -                             | C-H bending vibrations    |
|          | -                       | 1435                      | -                            | -                             | -                                    | -                                        | -                             | O-H bending vibrations    |
|          | -                       | 1367                      | 1369                         | +2                            | -                                    | -                                        | -                             | N-O stretching vibrations |
|          | 1414                    | -                         | 1412                         | -2                            | -                                    | 1412                                     | -2                            | O-H bending vibrations    |
|          | 1313                    | -                         | 1312                         | -1                            | -                                    | 1312                                     | -1                            | O-H bending vibrations    |
|          | -                       | 1290                      | -                            | -                             | -                                    | -                                        | -                             | C-N                       |
|          | -                       | -                         | -                            | -                             | 1256                                 | -                                        | -                             | C-O stretching vibrations |
|          | 1228                    | -                         | 1225                         | -3                            | -                                    | 1222                                     | 6                             | C-O stretching vibrations |
|          | 1169                    | -                         | 1108                         | -61                           | -                                    | 1105                                     | 64                            | C-O stretching vibrations |
|          | 1076                    | -                         | 1073                         | 3                             | 1043                                 | 1068                                     | 25                            | C-O stretching vibrations |
|          | 818                     | 881                       | 818                          | 63                            | -                                    | 813                                      | 5                             | C-H bending vibrations    |
|          | 770                     | -                         | 770                          | -                             | -                                    | 770                                      | -                             | C-H bending vibrations    |

<sup>1</sup>(+) determines upshifts related to certain sample;<sup>2</sup>(-) determines downshifts related to certain sample.

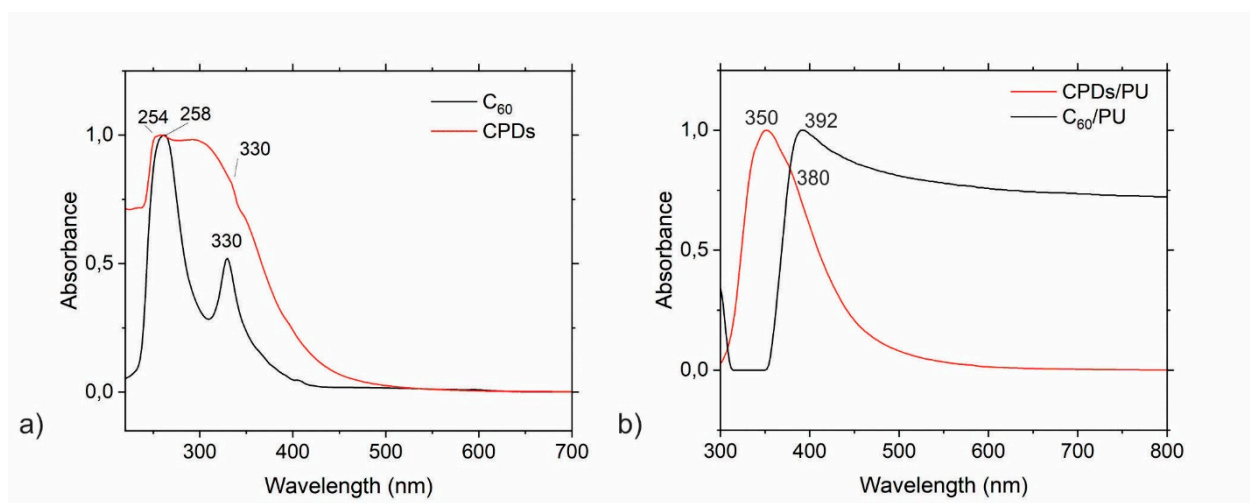

**Figure S2.** (a) UV-Vis spectra of  $C_{60}$  (black curve) and CPDs (red curve) and (b) UV-Vis spectra of  $C_{60}/PU$  (black curve) and CPDs/PU (red curve) composite films. All UV-Vis spectra were normalized to 1.
